# Supplementary material for: Depolymerization of Pine Wood Organosolv Lignin in Ethanol Medium over NiCu/SiO2 and NiCuMo/SiO2 Catalysts: Impact of Temperature and Catalyst Composition
Source: MDPI journal article supplement (doi:10.3390/polym15244722), 2023-12-15
Supplement: s1 [file s1]

## Supplementary materials

# Depolymerization of Pine Wood Organosolv lignin in Ethanol Medium over NiCu/SiO<sub>2</sub> and NiCuMo/SiO<sub>2</sub> Catalysts. Impact of Temperature and Catalyst Composition

Angelina V. Miroshnikova<sup>1,3</sup>, Sergey V. Baryshnikov<sup>1</sup>, Yuriy N. Malyar<sup>1,3</sup>, Li Xiaomin<sup>3</sup>, Maria V. Alekseeva<sup>2</sup>, Boris N. Kuznetsov<sup>1,3</sup>, Oxana P. Taran<sup>1,2,3</sup>

<sup>1</sup> Institute of Chemistry and Chemical Technology Siberian Branch, Russian Academy of Sciences, FRC Krasnoyarsk Science Center SB RAS, Akademgorodok 50, Bld. 24, Krasnoyarsk 660036, Russia; miroshnikova.av@icct.krasn.ru (A.V.M.); bsv2861@mail.ru (S.V.B.); yumalyar@gmail.com (Y.N.M.); bnk@icct.ru (B.N.K.); taran.op@icct.krasn.ru (O.P.T),

<sup>2</sup> Federal Research Center "Boreskov Institute of Catalysis", Pr. Akademika Lavrentieva 5, Novosibirsk 630090, Russia; bykova@catalysis.ru (M.V.A); oxanap@catalysis.ru (O.P.T),

<sup>3</sup> Institute of Non-Ferrous Metals and Material Science, Department of Analytical and Organic Chemistry, Siberian Federal University, pr. Svobodny 79, Krasnoyarsk 660041, Russia; li-xiaomin@mail.ru (L.X.)

\* Correspondence: miroshnikova35@gmail.com (A.V.M.); taran.op@icct.krasn.ru (O.P.T.)

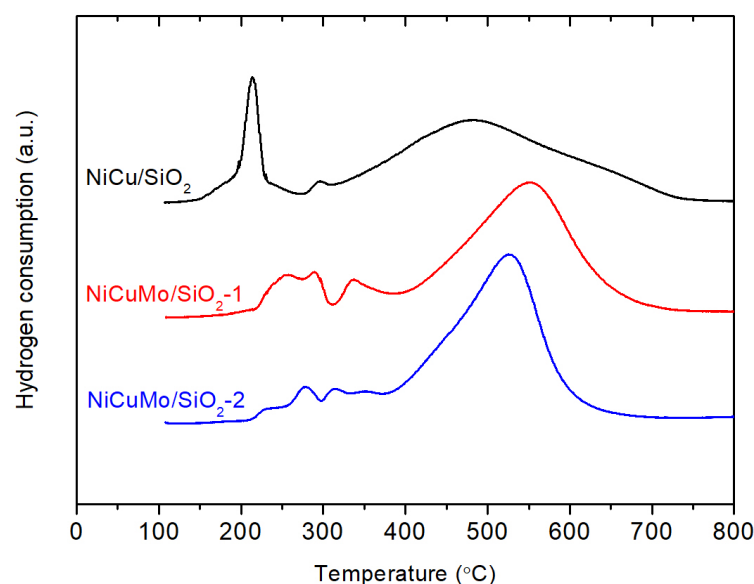

Fig. S1 TPR profiles of the catalysts

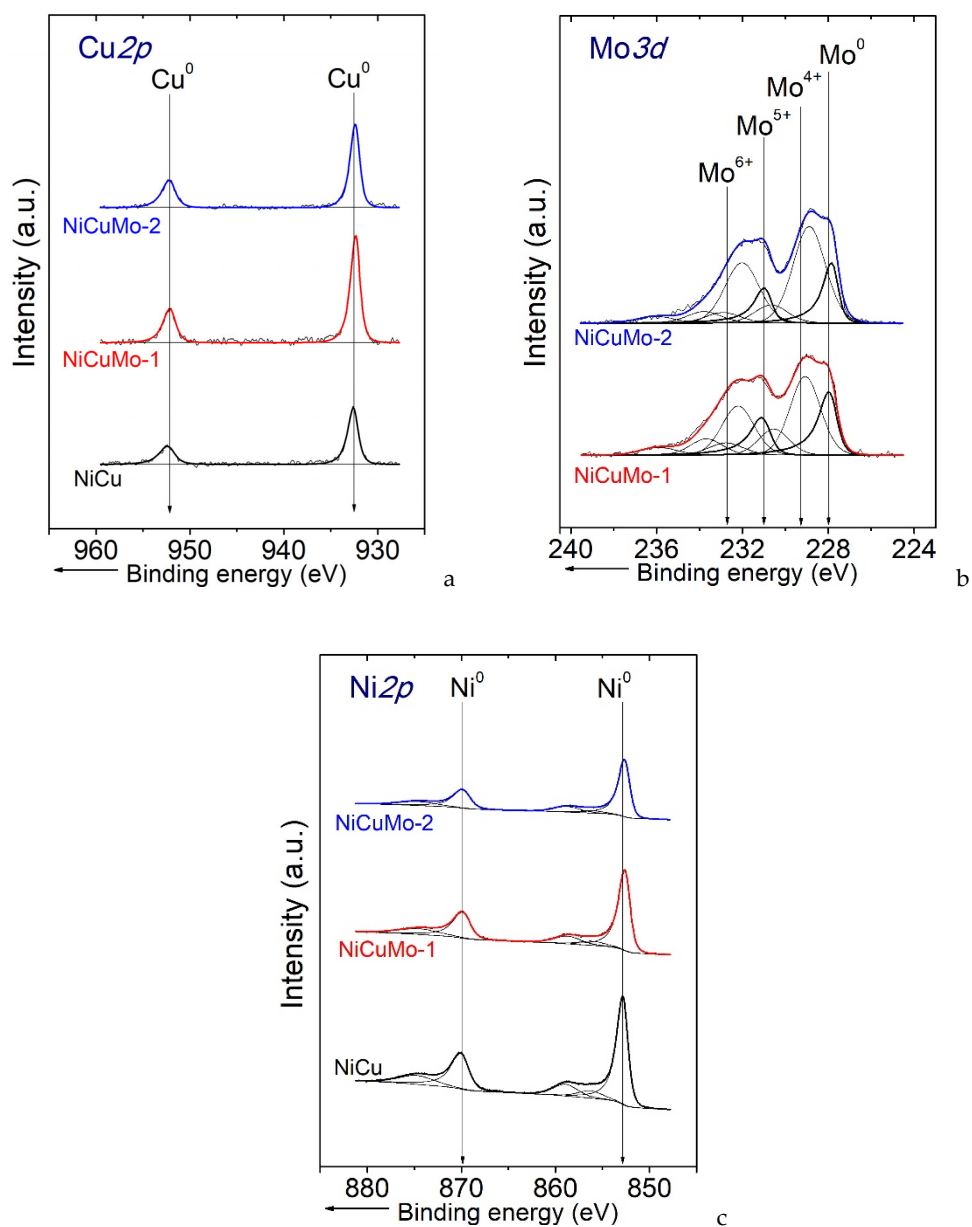

Fig. S2 Cu2p (a), Mo3d (b), and Ni2p (c)XPS spectra of reduced catalysts with the various Mo content

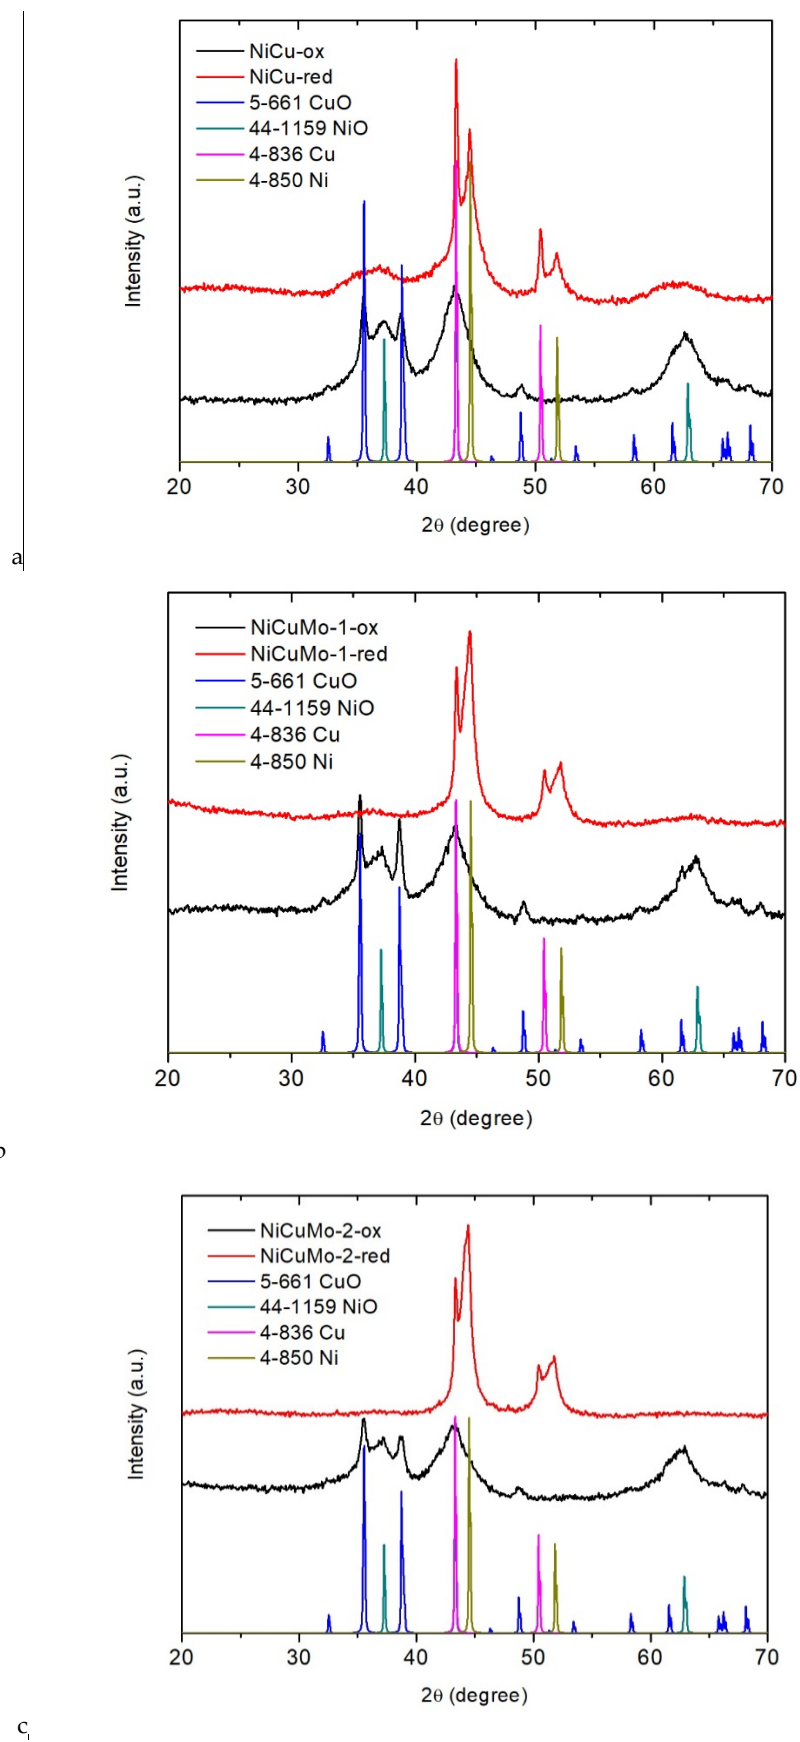

Fig. S3 XRD patterns of the catalysts: a) NiCu/SiO<sub>2</sub>; b) NiCuMo/SiO<sub>2</sub>-1; c) NiCuMo/SiO<sub>2</sub>-2

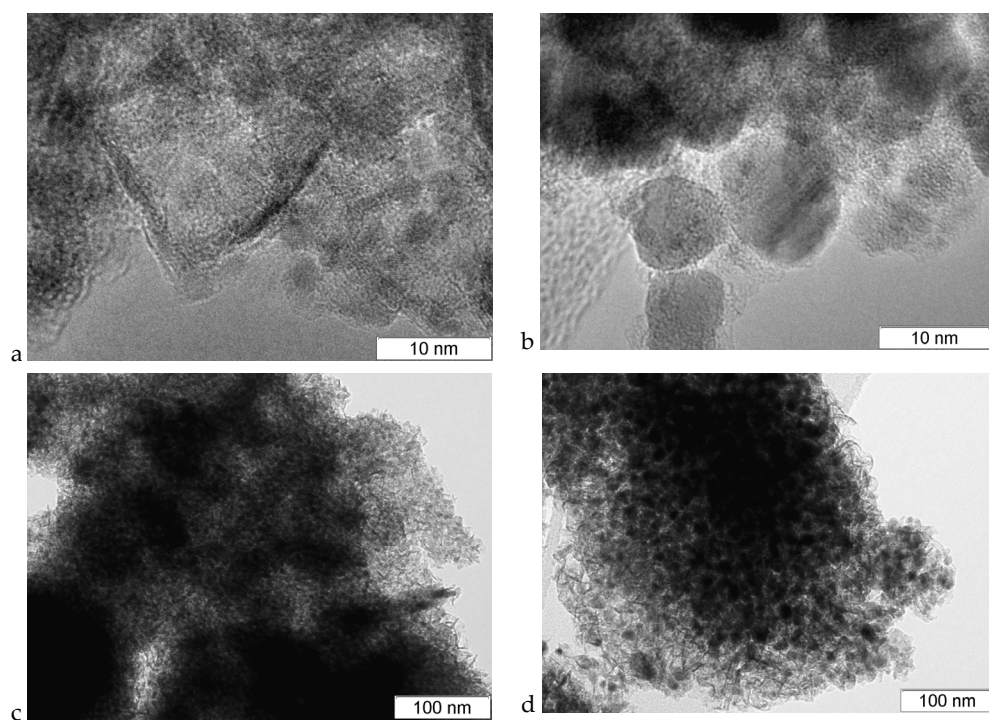

Fig. S4 HRTEM images of the samples a,c) NiCu/SiO<sub>2</sub>, b,d) NiCuMo/SiO<sub>2</sub>-1

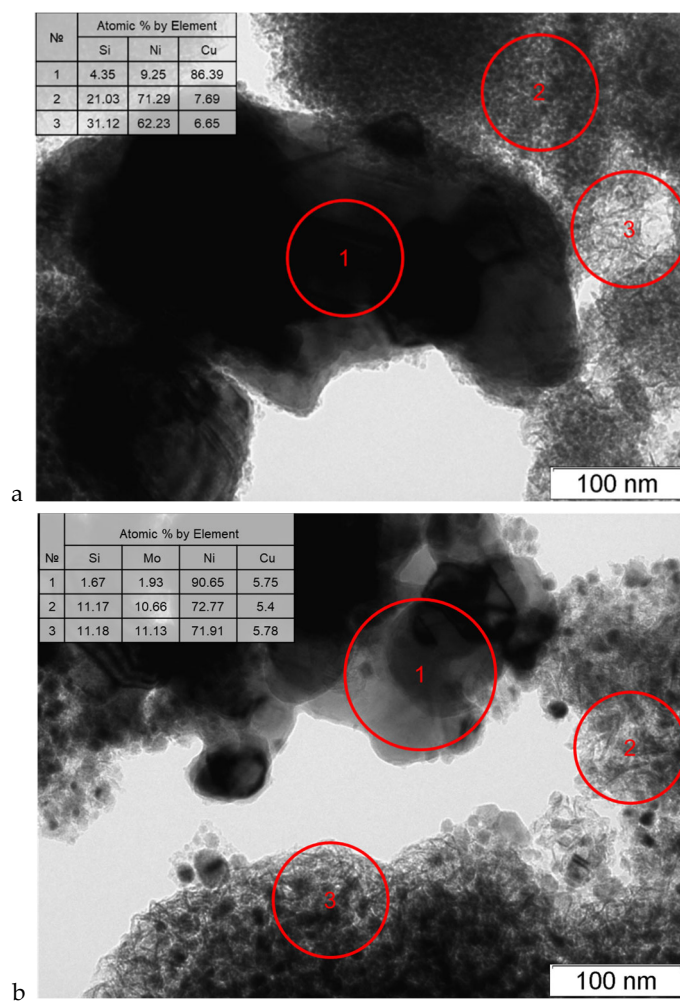

Fig. S5 HRTEM images and EDX of the samples a) NiCu/SiO<sub>2</sub>, b) NiCuMo/SiO<sub>2</sub>-1

**Table S1.** The composition and texture characteristics of the catalysts\*.

| Catalyst                   | Composition of catalysts, wt. % |     |      |     | Mo/Ni<br>atomic ratio | $S_{\text{BET}}$ , m <sup>2</sup> /g | $V_{\Sigma}$ , cm <sup>3</sup> /g | $V_{\text{micro}}$ , cm <sup>3</sup> /g | $\langle d \rangle_{\text{pore}}$ , Å |
|----------------------------|---------------------------------|-----|------|-----|-----------------------|--------------------------------------|-----------------------------------|-----------------------------------------|---------------------------------------|
|                            | Ni                              | Cu  | Mo   | Si  |                       |                                      |                                   |                                         |                                       |
| NiCu/SiO <sub>2</sub>      | 56                              | 8.2 | -    | 8.5 | -                     | 174.6                                | 0.21                              | 0.01                                    | 48                                    |
| NiCuMo/SiO <sub>2</sub> -1 | 49                              | 7.1 | 8.8  | 7.4 | 0.11                  | 115.0                                | 0.22                              | 0.01                                    | 83                                    |
| NiCuMo/SiO <sub>2</sub> -2 | 46                              | 6.7 | 11.7 | 7.0 | 0.16                  | 109.0                                | 0.23                              | 0.01                                    | 83                                    |

\*  $S_{\text{BET}}$  is specific surface area according to BET,  $V_{\Sigma}$  total pore volume,  $V_{\text{micro}}$  micropore volume,  $\langle d \rangle$  average pore size.

**Table S2.** Yields of products of thermal and catalytic conversion of pine ethanol lignin in supercritical ethanol medium. Reprinted with permission from Ref. [1]

| T, °C | Catalyst                    | Yields, wt % |        |         |                 |                 |      |
|-------|-----------------------------|--------------|--------|---------|-----------------|-----------------|------|
|       |                             | Liquids      | Solids | Gaseous |                 |                 |      |
|       |                             |              |        | CO      | CO <sub>2</sub> | CH <sub>4</sub> | Sum  |
| 250   | No catalyst                 | 68.2         | 29.5   | < 0.1   | < 0.1           | < 0.1           | 0.1  |
|       | NiCu/SiO <sub>2</sub>       | 68.9         | 27.1   | 0.3     | 0.1             | 0.2             | 0.6  |
|       | NiCuMo/SiO <sub>2</sub> -1  | 69.4         | 26.3   | 0.2     | 0.1             | 0.1             | 0.4  |
| 300   | No catalyst                 | 63.4         | 31.8   | < 0.1   | 0.1             | 0.1             | 0.3  |
|       | NiCu/SiO <sub>2</sub>       | 78.0         | 15.8   | 3.4     | 1.2             | 2.4             | 7.0  |
|       | NiCuMo/SiO <sub>2</sub> -1  | 83.5         | 7.9    | 2.3     | 1.6             | 2.1             | 6.0  |
|       | NiCuMo/SiO <sub>2</sub> -2  | 83.0         | 8.9    | 2.2     | 1.7             | 2.0             | 5.9  |
|       | NiCu/SiO <sub>2</sub> *     | 75.5         | 14.5   | 3.6     | 0.8             | 2.9             | 7.3  |
|       | NiCuMo/SiO <sub>2</sub> -1* | 80.9         | 9.7    | 3.0     | 1.3             | 2.7             | 7.0  |
| 350   | No catalyst                 | 51.1         | 44.7   | 1.0     | 0.5             | 0.9             | 2.4  |
|       | NiCu/SiO <sub>2</sub>       | 80.6         | 1.0    | 7.1     | 1.9             | 3.5             | 11.5 |
|       | NiCuMo/SiO <sub>2</sub> -1  | 82.5         | 0.8    | 5.0     | 2.4             | 3.3             | 10.7 |
|       | NiCuMo/SiO <sub>2</sub> -2  | 77.9         | 6.3    | 4.5     | 2.7             | 3.0             | 10.2 |

\*Regenerated catalyst

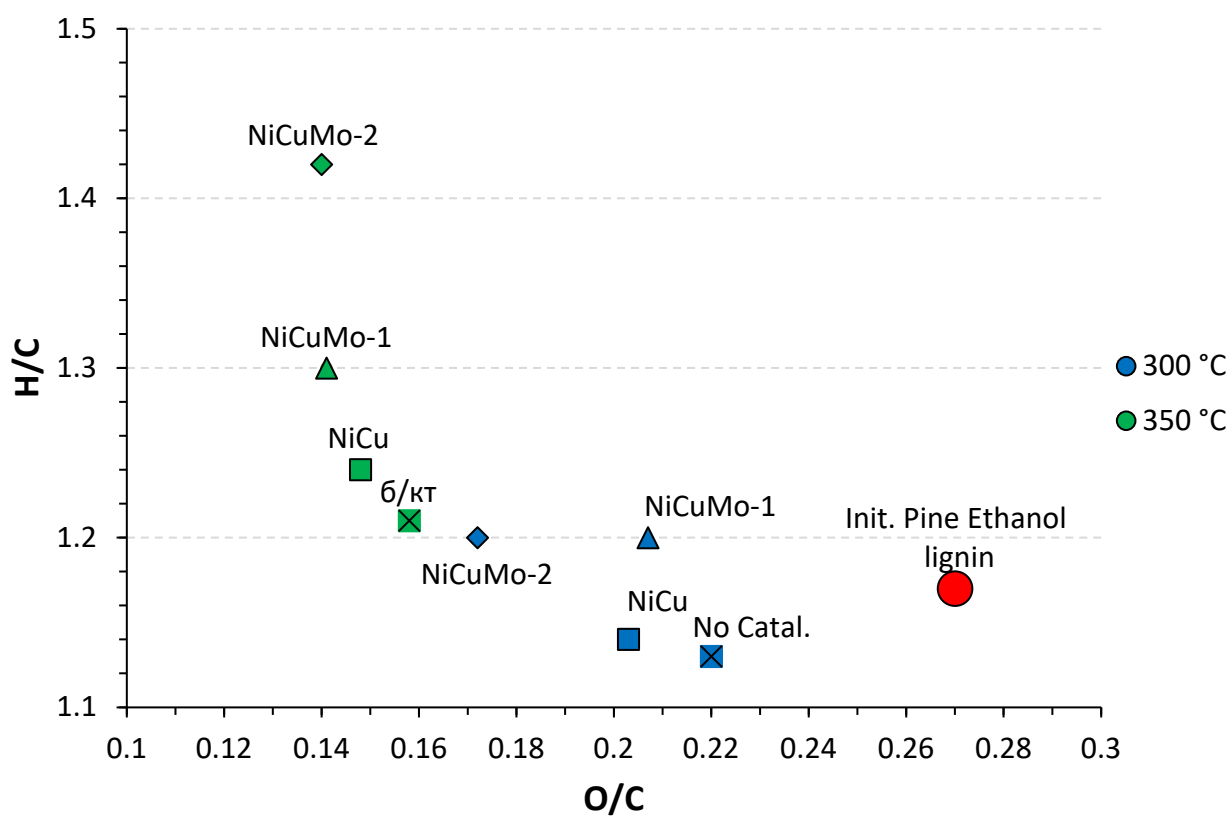

Fig.S6 Van Crevelen diagram for liquid products obtained from pine ethanol lignin over the NiCu/SiO<sub>2</sub> and NiCuMo/SiO<sub>2</sub> catalysts with different Mo content at 300 and 350 °C Reprinted with permission from Ref.[1]

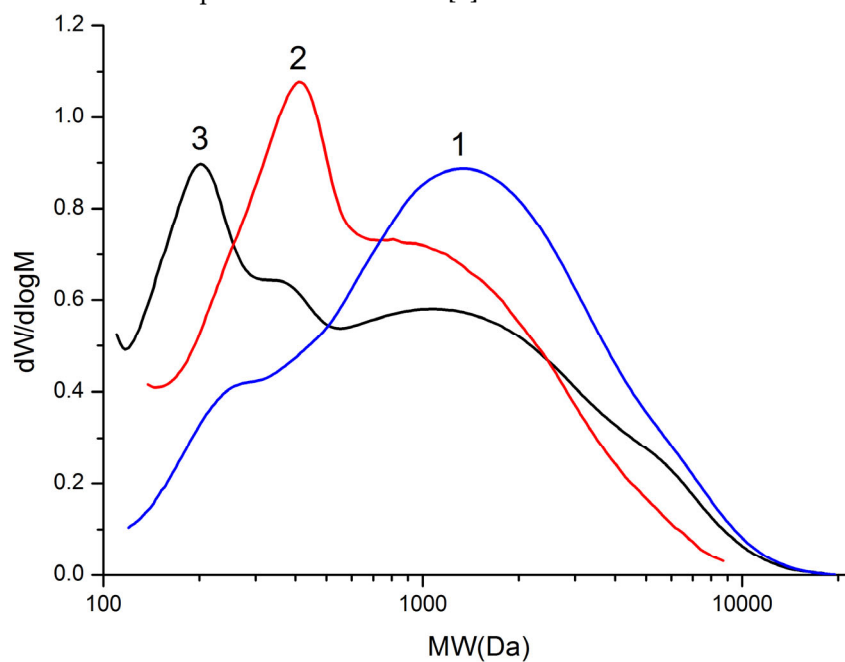

Fig.S7 Molecular mass distribution in initial pine ethanol lignin (1); liquid products obtained at 300 °C over NiCu/SiO<sub>2</sub> (2) and NiCuMo/SiO<sub>2</sub>-1 (3) catalysts. Reprinted with permission from Ref.[1]

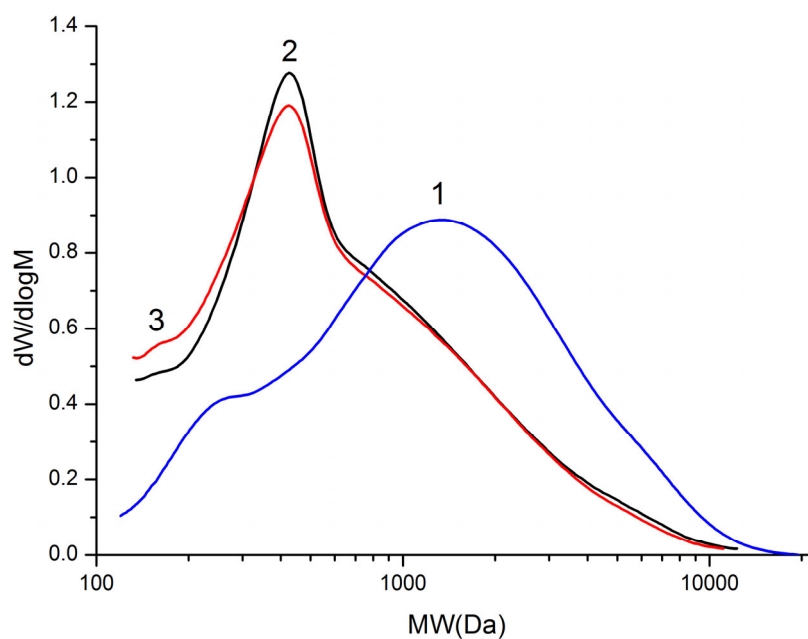

Fig.S8 Molecular mass distribution in initial pine ethanol lignin (1); liquid products obtained at 350 °C over NiCu/SiO<sub>2</sub> (2) and NiCuMo/SiO<sub>2</sub>-1 (3) catalysts. Reprinted with permission from Ref. [1]

1. Miroshnikova, A.V.; Baryshnikov, S.V.; Malyar, Y.N.; Yakovlev, V.A.; Taran, O.P.; Djakovitch, L.; Kuznetsov, B.N. Depolymerization of Pine Ethanol Lignin in the Medium of Supercritical Ethanol in the Presence of Catalysts NiCu/SiO<sub>2</sub> and NiCuMo/SiO<sub>2</sub>. *Journal of Siberian Federal University. Chemistry* **2020**, *13*, 247-259.
